# Supplementary material for: BioLQM: A Java Toolkit for the Manipulation and Conversion of Logical Qualitative Models of Biological Networks
Source: Front Physiol. 2018 Nov 19;9:1605. doi: 10.3389/fphys.2018.01605 (PMC6254088; doi:10.3389/fphys.2018.01605)
Supplement: Supplementary file 1 [file Presentation_1.pdf]

# [Appendix] BioLQM: a java toolkit for the manipulation and conversion of Logical Qualitative Models of biological networks

Aurélien Naldi<sup>1,\*</sup>

<sup>1</sup> Computational Systems Biology Team, Institut de biologie de l'École normale supérieure (IBENS),  
École normale supérieure, CNRS, INSERM, PSL Université Paris, France,

Correspondence\*:  
Aurélien Naldi  
aurelien.naldi@ens.fr

This document contains some formal definitions of the methods implemented in the bioLQM software. It completes the technology report published in *frontiers in Physiology*, which provides a general introduction to the formalism and software.

The main document is available with DOI: 10.3389/fphys.2018.01605.

The bioLQM software is available at <http://www.colomoto.org/biolqm>.

## 1 LOGICAL QUALITATIVE MODEL

A **Logical Qualitative Model**  $\mathcal{L} = (\mathcal{G}, \mathcal{M}, \mathcal{F})$  with  $n$  components is defined by:

- $\mathcal{G} = \{g_i\}_{i=1\dots n}$ , the set of its components.
- $\mathcal{M} = \{m_i \in \mathbb{N}^*\}_{i=1\dots n}$ , the maximal activity levels of these components,  
 $\mathcal{S}_i = [0, m_i]$  is the activity range of the component  $g_i$ , and  $\mathcal{S} = \prod \mathcal{S}_i$  is the state space.
- $\mathcal{F} = \{f_i : \mathcal{S} \rightarrow \mathcal{S}_i\}_{i=1\dots n}$ , the logical functions defining its dynamical behavior.

A **Boolean model**  $(\mathcal{G}, \mathcal{F})$  is a logical qualitative model such that all  $m_i = 1 \forall i \in [1, n]$  (i.e.  $\mathcal{S} = [0, 1]^n$ ).

## 2 STATE SPACE AND DYNAMICS

In the following, we define the state and dynamics of a model, which can be computed from its logical functions  $f_i$ . For simplicity, we use  $i$  as a shorthand for  $g_i$  when no ambiguity is possible.

A (qualitative) state  $x \in \mathcal{S}$  of the model is a vector giving the activity levels of all components, where  $x_i$  denotes the activity of the component  $i$ :  $x = (x_i \in \mathcal{S}_i)_{i=1\dots n}$ . A component  $i$  is **called to update** in the state  $x$  if  $f_i(x) \neq x_i$ . The state  $x$  is a **stable state** (also called fixed point, or steady state) if no component is called to update, i.e. if  $x_i = f_i(x) \forall i \in 1 \dots n$ .

We define unitary update functions  $u_i : \mathcal{S} \rightarrow \mathcal{S}_i$  such that  $u_i(x) = x_i + \Delta_i(x)$ , where

$$\Delta_i(x) = \begin{cases} 0 & \text{if } f_i(x) = x_i \\ 1 & \text{if } f_i(x) > x_i \\ -1 & \text{if } f_i(x) < x_i \end{cases}$$

In the Boolean case, these unitary functions are identical to the logical functions  $f_i$  by construction. They enforce unitary transitions in the multi-valued case.

We call  $f(x) = (f_i(x))_{i=1\dots n}$  the **image** of the state  $x$ , and  $u(x) = (u_i(x))_{i=1\dots n}$  its **unitary image**.

Given a state  $x \in \mathcal{S}$  and a subset of the components  $p \subset \mathcal{G}$ , let  $\bar{x}^p$  be the state where all the components of the subset have been updated at once:

$$\bar{x}_i^p = \begin{cases} u_i(x) & \text{if } i \in p \\ x_i & \text{otherwise} \end{cases}.$$

For simplicity,  $\bar{x}^i$  denotes  $\bar{x}^{\{i\}}$ .

### Deterministic updatings

- In the **synchronous** updating, the unique successor of  $x$  is its unitary image  $u(x)$ .
- In the **sequential** updating following the default order of components, the unique successor of the state  $x$  is  $(u_n \circ \dots \circ u_1)(x)$ . A different sequential updater can be defined for each possible ordering of  $\mathcal{G}$ .
- A **block-sequential** updater is based on an ordered partition of  $\mathcal{G}$  in  $m$  non-overlapping subsets ( $m \leq n$ ). Let  $\mathcal{P} = (p_1, \dots, p_m \mid p_k \subset \mathcal{G} \ \forall k)$  be this ordered partition. The function  $v_k : \mathcal{S} \rightarrow \mathcal{S}$  such that  $v_k(x) = \bar{x}^{p_k}$  updates all components of the subset  $p_k$  synchronously. The unique successor of the state  $x$  by the block-sequential updater defined by the ordered partition  $\mathcal{P}$  is then given by combining these functions:  $(v_m \circ \dots \circ v_1)(x)$ .
- The **synchronous priority** updating is based on the partitioning  $\mathcal{P}$  defined for the block-sequential case, but only the first updated subset is considered. If the state  $x$  is not a stable state, then there exists  $k$  such that the subset  $p_k$  is the first one containing updated components:  $v_k(x) \neq x$  and  $v_i(x) = x \ \forall i < k$ . Then  $v_k(x)$  is the successor of  $x$  in this updating. Note that this type of updating is the deterministic subset of the non-deterministic priority updatings defined below.

### Non-deterministic updatings

- In the **asynchronous** updating, all logical functions are applied independently and all successors of the state  $x$  differ from  $x$  by exactly one component: the set of successors of  $x$  is  $\{\bar{x}^i \neq x \ \forall i \in \mathcal{G}\}$ .
- In the **complete** updating, any number of components can be updated at once: the set of successors of  $x$  is  $\{\bar{x}^p \neq x \ \forall p \subset \mathcal{G}\}$ . This set of successors includes all asynchronous successors, as well as the synchronous one.
- The **priority** updater generalizes the *synchronous priority* defined above by considering asynchronous updates between the blocks (priority classes). Starting with  $\mathcal{P} = (p_1, \dots, p_m \mid p_k \subset \mathcal{G} \ \forall k)$ , the ordered partition of  $\mathcal{G}$  defined above, each subset  $p_k$  is further partitioned in  $a_k$  subsets  $p_{k,1}, \dots, p_{k,a_k}$ . If the state  $x$  is not a stable state, then there exists  $k$  such that the subset  $p_k$  is the first one containing updated components:  $v_k(x) \neq x$  and  $v_i(x) = x \ \forall i < k$ . Then  $v_{k,1}(x), \dots, v_{k,a_k}(x)$  are the  $a_k$  successors of  $x$  in this updating.

### 3 MODEL MODIFICATIONS

#### Range restriction

We call  $f_i^{a,b}$  the restriction of the function  $f_i$  to the range  $[a, b]$  (with  $0 \leq a \leq b \leq m_i$ ) such that:

$$f_i^{a,b}(x) = \begin{cases} a & f_i(x) < a \\ b & f_i(x) > b \\ f_i(x) & \text{otherwise: } a \leq f_i(x) \leq b \end{cases}.$$

#### Perturbation of an interaction

The removal of an interaction  $(i, j)$  (*i.e.* the removal of  $i$  from the regulators of  $j$ ) further requires the specification of  $v \in \mathcal{S}_i$  and leads to the modification of  $f_j$ , the logical rule associated to  $j$ .

Let  $x^{i,v}$  be the state such that  $x_i^{i,v} = v$  and  $x_k^{i,v} = x_k \forall k \neq i$ . The perturbation constructs the modified function  $f_j^{i,v} = f_j(x^{i,v})$ .
